# Supplementary material
Source: Springer Nature journal article supplement (https://www.springermedizin.de/resource/supplementary/12885_2013_4217_MOESM3_ESM.pdf/9465706)

**A**

```

1  MAERRRHKKRIQEVGEPSSKEEKAVAKYLRFNCPCTKSTNMMGHRVDYFIAS 50
51  KAVDCLLDSDKWAKAKKGEEALFTTRESVVDYCNRLKKQFFHRALKVMKM 100
101 KYDKDKIKKEKDKGKAESGKEEDKKSCKENIKDEKTKKEKEKDKGEGEES 150
151  KKEETPGTPKKKETKKKFKLEPHDDQVFLDGNVYVWIYDPVHFKTFVMG 200
201  LILVIAVIAATLFPWLWPAEMRVGVYYLSVGAGCFVASILLLAVARCTLFL 250
251  IILWLITGGRHHFWFLPNLTADVGFIDSFRPLYTHEYKGPKADLKKDEKSE 300
301  TKKQOKSDSEEKSDSEKKEDEEGKVGPGNHGTEGSGGERHSDDTSDRRED 350
351  DRSQHSNGNDNFEMITKEELEQQTDGDCEEDEEEENDGETPKSSSHEKS 399

```

**C**

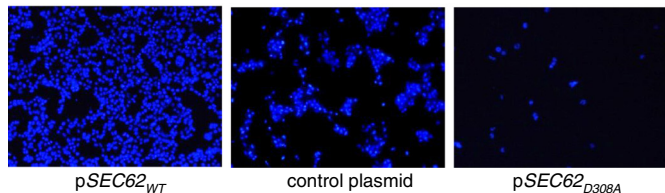

**D**

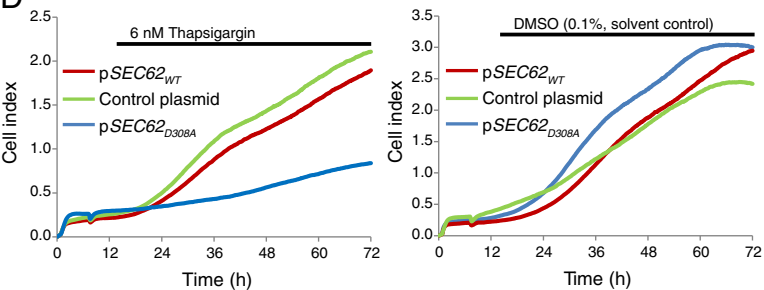

**B**

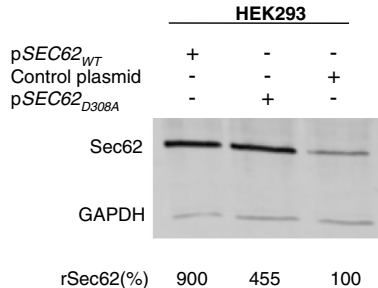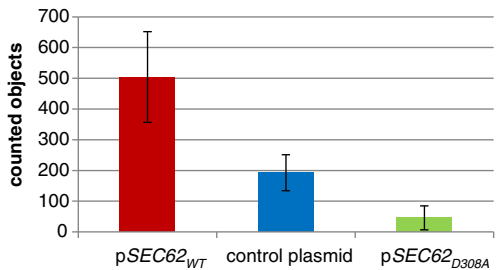

**E**

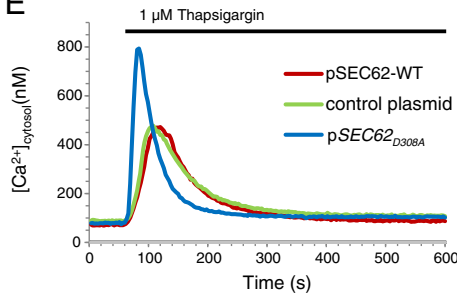

Supplement: MOESM3 [file 9465706]
